# Supplementary material
Source: PubMed Central journal article supplement (PMC4107670)

Supporting Information

Figure S1

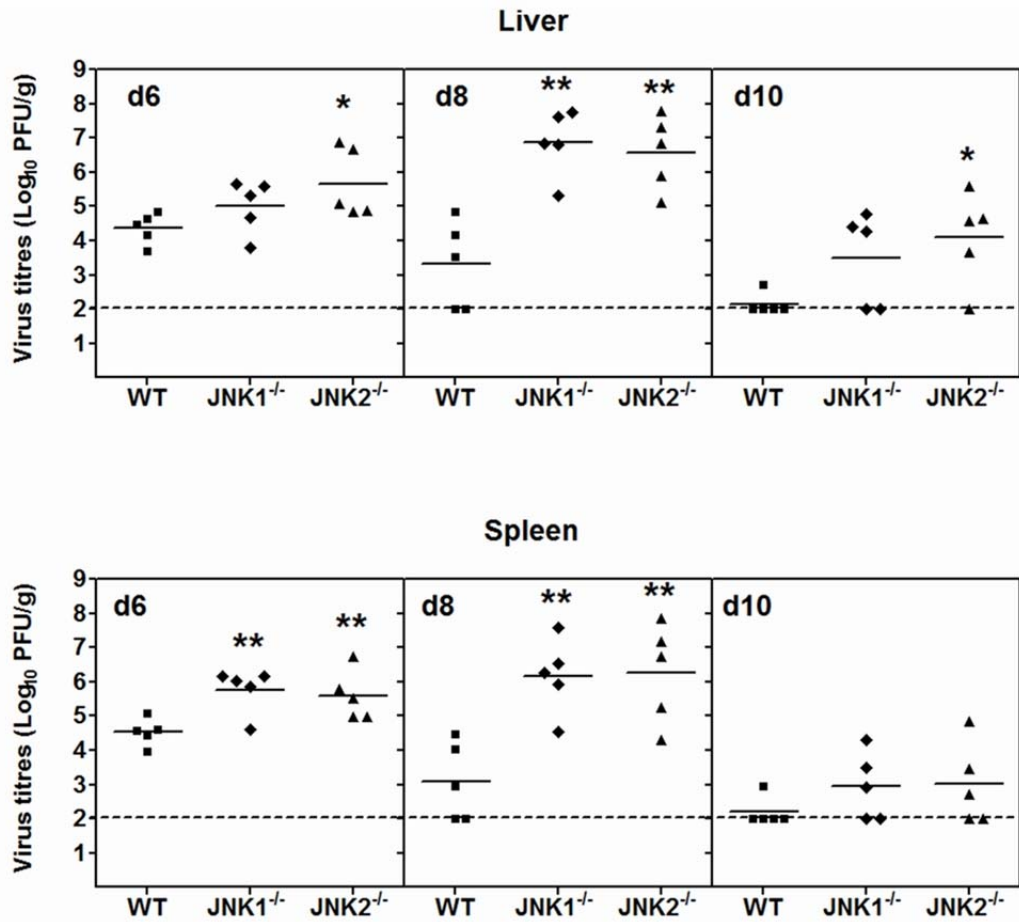

Figure S2

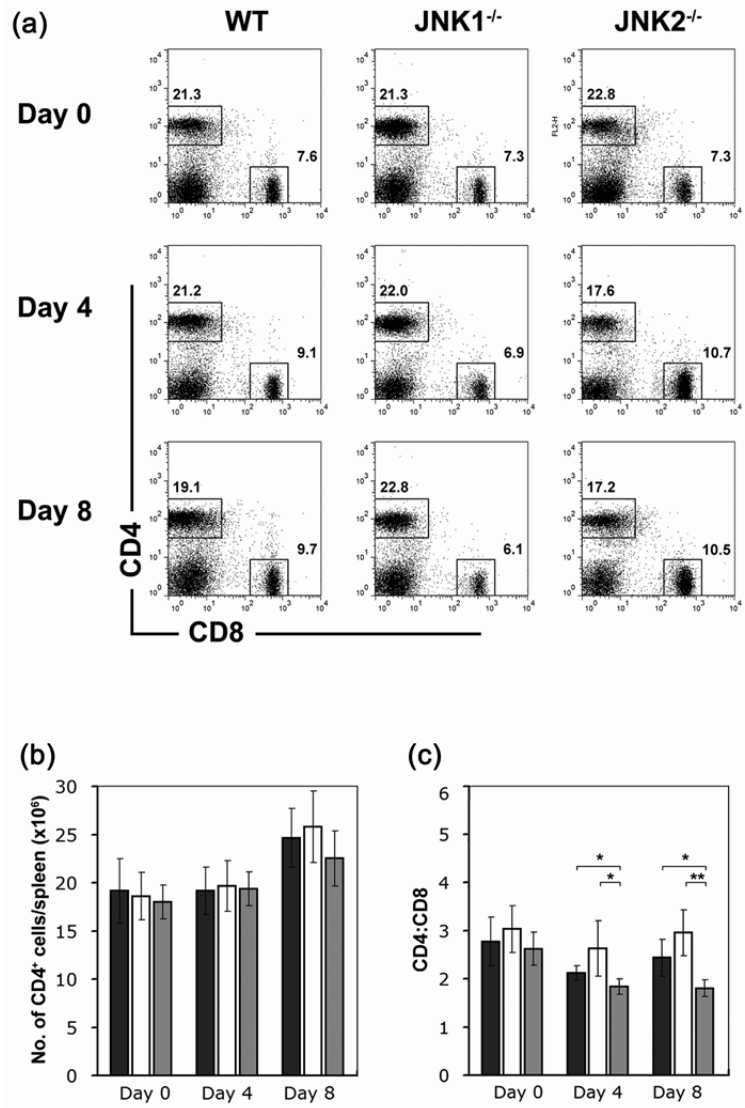

Figure S3

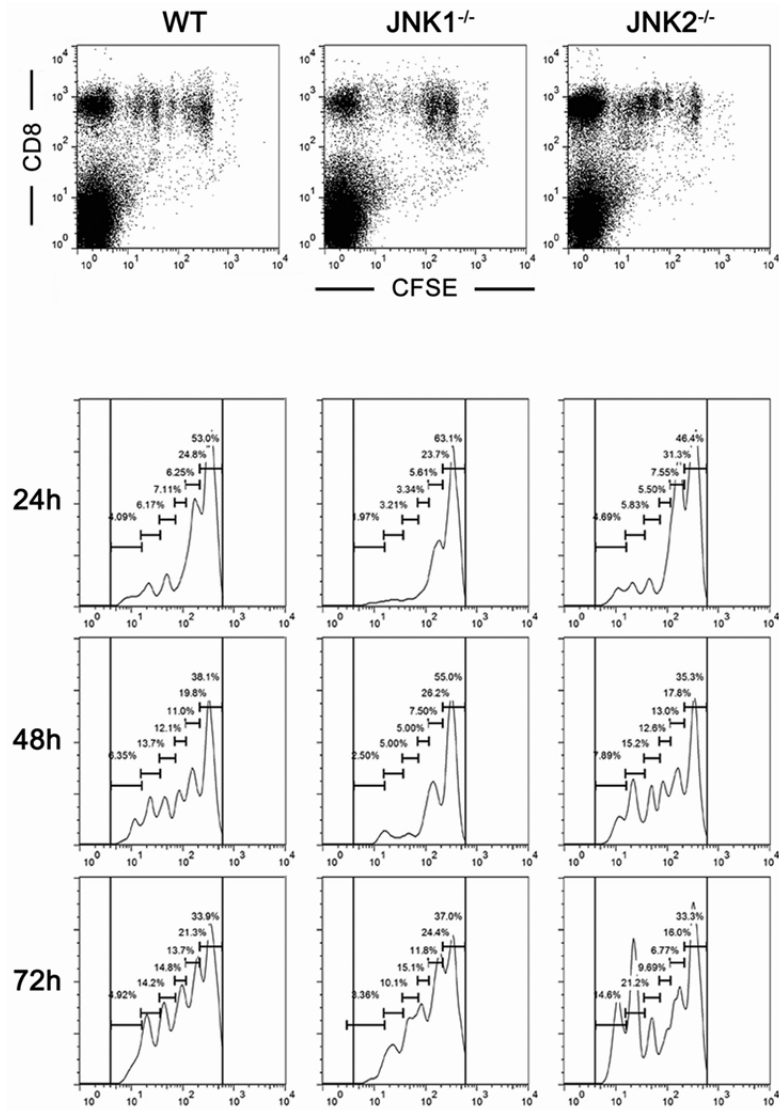

Figure S4

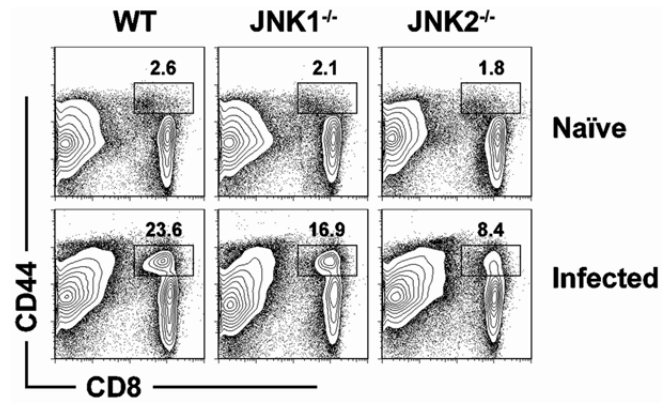

Supplement: imm0142-0603-SD1.pdf [file imm0142-0603-SD1.pdf]
